# Supplementary material for: Group-1 Grass Pollen Allergens with Near-Identical Sequences Identified in Species of Subtropical Grasses Commonly Found in Southeast Asia
Source: MDPI journal article supplement (doi:10.3390/medicina55050193), 2019-05-22
Supplement: s1 [file s1]

**Supplemental Table S1** Nucleotide sequences from cDNA clones of eight grass species.

| Grass species        | No. of clones | Seq. identity among clones* | Homologous Cyn d 1 sequence <sup>#</sup> |
|----------------------|---------------|-----------------------------|------------------------------------------|
| <i>Zo. matrella</i>  | 4             | 99.76-100.0%                | Cyn d 1.0203; AF177380.1 (85%)           |
| <i>P. indica</i>     | 3             | 99.88-100.00%               | Cyn d 1.0203; AF177380.1 (85%)           |
| <i>B. pertusa</i>    | 4             | 99.33-99.51%                | Cyn d 1.0203; AF177380.1 (85%)           |
| <i>S. halepense</i>  | 4             | 99.20-99.30%                | Cyn d 1.0203; AF177380.1 (86%)           |
| <i>S. spontaneum</i> | 2             | 100%                        | Cyn d 1.0203; AF177380.1 (85%)           |
| <i>Ze. mays</i>      | 4             | 95.24-99.02%                | Cyn d 1.0203; AF177380.1 (83%)           |
| <i>E. procera</i>    | 4             | 97.43-100.00%               | Cyn d 1.0203; AF177380.1 (85%)           |
| <i>M. repens</i>     | 3             | 99.39-99.51%                | Cyn d 1.0202; AF177378.1 (85%)           |

\*, Sequence identity among clones was analyzed using Clustal Omega. <sup>#</sup>; Homologous sequences were analyzed using nucleotide Blastn analysis with more than 80% sequence identity. Percentages of sequence identities are presented in parentheses.
